# Supplementary material for: Spatial Patterns and Scales of Collembola Taxonomic and Functional Diversity in Urban Parks
Source: MDPI journal article supplement (doi:10.3390/su132313029), 2021-11-25
Supplement: s1 [file s1]

# Spatial Patterns and Scales of Collembola Taxonomic and Functional Diversity in Urban Parks

Alessandro Bellino<sup>1</sup>, Daniela Baldantoni<sup>1</sup>, Vittoria Milano<sup>2,3</sup>, Lucia Santorufo<sup>2,4</sup>, Jérôme Cortet<sup>3</sup>, and Giulia Maisto<sup>2,4</sup>

<sup>1</sup>Department of Chemistry and Biology, University of Salerno, Via Giovanni Paolo II, 132 - 84084 - Fisciano (SA), Italy

<sup>2</sup>Department of Biology, University of Naples Federico II, via Cinthia, 80126 Napoli, Italy

<sup>3</sup>CEFE UMR5175, University Paul Valéry Montpellier, University of Montpellier, EPHE, CNRS, IRD, route de Mende, 34000 Montpellier, France

<sup>4</sup>BAT Center-Interuniversity Center for Studies on Bioinspired Agro-environmental Technology, University of Naples Federico II, 80100 Naples, Italy

**Table S1** Characteristics of parks from Naples (N) and Montpellier (M). The coding for park names, soil origin (N: native, T: technosol), previous land use (A: agricultural land, Ab: abandoned area, F: forest, L: leisure estate, Tq: tuff quarry, U: urban) as well as the abbreviations for dissolved organic carbon (DOC), urban density (UD) and bulk density (BD) follow the ones adopted in Milano et al. [13,14]. The presence (P) or absence (A) of litter, canopy cover and brushwood is also reported, as well as the soil carbon to nitrogen ratio (C/N).

| City | Park | Longitude<br>°E | Latitude<br>°N | Elevation<br>m a.s.l. | UD<br>% | Age         | Previous land use | Canopy | Brushwood | Litter | Soil origin | BD<br>g cm <sup>-3</sup> | pH        | DOC<br>mg Kg <sup>-1</sup> d.w. | C/N         |
|------|------|-----------------|----------------|-----------------------|---------|-------------|-------------------|--------|-----------|--------|-------------|--------------------------|-----------|---------------------------------|-------------|
| M    | aze  | 3.819906        | 43.612023      | 31 - 33               | 60      | old         | A                 | A      | A         | A      | T           | 1.1 - 1.3                | 7.4 - 7.5 | 701.4 - 821.1                   | 15.7 - 19.3 |
| M    | boi  | 3.868619        | 43.611408      | 45 - 48               | 34      | very old    | F                 | P      | A - P     | P      | N           | 0.7 - 1.2                | 6.8 - 7.4 | 691.5 - 986.4                   | 14.5 - 27.6 |
| M    | cha  | 3.903754        | 43.600852      | 12 - 13               | 56      | young       | A                 | A - P  | A         | A      | T           | 1.1 - 1.6                | 7.3 - 7.7 | 519.3 - 841.5                   | 18.1 - 46.9 |
| M    | edi  | 3.888310        | 43.621799      | 31 - 32               | 50      | old         | F                 | P      | A         | P      | N           | 0.5 - 0.9                | 7.0 - 7.5 | 923.1 - 1630.5                  | 13.0 - 26.3 |
| M    | fia  | 3.856245        | 43.633844      | 62 - 69               | 47      | young       | A                 | A      | A         | A      | T           | 1.0 - 1.3                | 7.3 - 7.9 | 508.8 - 1195.8                  | 15.4 - 33.0 |
| M    | fon  | 3.829487        | 43.606959      | 52 - 69               | 33      | old         | F                 | A - P  | A - P     | A - P  | N - T       | 0.5 - 1.4                | 6.8 - 7.6 | 222.4 - 1649.4                  | 14.8 - 26.6 |
| M    | gra  | 3.929102        | 43.615488      | 48 - 51               | 23      | old         | F                 | P      | P         | P      | N           | 0.4 - 1.0                | 6.7 - 7.3 | 892.8 - 1514.1                  | 13.6 - 18.0 |
| M    | gui  | 3.860506        | 43.607073      | 51 - 56               | 58      | old         | L - F             | A - P  | A - P     | A - P  | N           | 0.8 - 1.3                | 6.8 - 7.7 | 650.7 - 1712.1                  | 12.8 - 50.8 |
| M    | lir  | 3.908568        | 43.608106      | 20 - 26               | 48      | young - old | A - F             | A - P  | A - P     | A - P  | T           | 0.5 - 1.6                | 7.1 - 7.6 | 641.1 - 1590.6                  | 13.8 - 20.2 |
| M    | mer  | 3.892027        | 43.629798      | 40 - 44               | 43      | very old    | A - F             | A - P  | A - P     | A - P  | N           | 0.4 - 1.1                | 7.2 - 7.6 | 504.6 - 1478.7                  | 18.9 - 55.8 |
| M    | mos  | 3.832111        | 43.632813      | 65 - 76               | 37      | very old    | A                 | A      | A         | A      | N           | 0.8 - 1.0                | 7.1 - 7.5 | 517.2 - 712.5                   | 16.9 - 34.9 |
| M    | nou  | 3.854202        | 43.582142      | 34 - 43               | 30      | young - old | A - F             | A - P  | A - P     | A - P  | N           | 0.5 - 1.2                | 6.4 - 7.4 | 535.2 - 1435.5                  | 13.3 - 26.0 |
| M    | pey  | 3.830359        | 43.597791      | 50 - 57               | 87      | old         | U                 | A      | A         | A      | T           | 1.0 - 1.2                | 7.4 - 7.5 | 705.0 - 948.3                   | 17.4 - 20.6 |
| M    | rac  | 3.867559        | 43.641192      | 81 - 92               | 40      | old         | F                 | P      | A         | A - P  | N           | 0.3 - 0.8                | 6.9 - 7.5 | 724.2 - 1375.5                  | 16.3 - 24.3 |
| N    | ast  | 14.155555       | 40.843214      | 20 - 45               | 9       | very old    | F                 | P      | P         | P      | N           | 0.2 - 0.5                | 5.7 - 6.4 | 1584.9 - 3054                   | 11.9 - 14.6 |
| N    | cap  | 14.251070       | 40.867287      | 126 - 143             | 37      | old         | F                 | A - P  | A - P     | A - P  | N           | 0.4 - 0.7                | 5.1 - 7.2 | 498.6 - 1478.4                  | 8.7 - 15.0  |
| N    | let  | 14.323279       | 40.838988      | 23                    | 65      | young       | F                 | A      | A         | P      | T           | 0.6 - 0.8                | 6.5 - 7.4 | 206.4 - 712.2                   | 10.8 - 13.1 |
| N    | nic  | 14.238689       | 40.875214      | 158 - 175             | 35      | young       | Tq                | A      | A         | A      | T           | 0.7 - 0.8                | 6.3 - 6.7 | 329.4 - 1126.2                  | 11.1 - 20.1 |
| N    | pog  | 14.239685       | 40.866866      | 175 - 185             | 49      | young       | Tq                | A - P  | A         | A - P  | T           | 0.5 - 0.8                | 6.5 - 7.1 | 253.1 - 947.4                   | 9.8 - 13.6  |
| N    | sca  | 14.242949       | 40.898979      | 113                   | 47      | young       | Ab                | A      | A         | A      | N           | 0.5 - 0.9                | 6.4 - 6.8 | 216.3 - 522.9                   | 10.3 - 12.1 |
| N    | tro  | 14.313866       | 40.833977      | 7 - 11                | 64      | young       | Ab                | A - P  | A - P     | A - P  | N - T       | 0.6 - 0.9                | 6.5 - 7.3 | 789.9 - 1809.6                  | 11.0 - 14.9 |
| N    | vir  | 14.179136       | 40.798450      | 132 - 177             | 25      | old         | F                 | A - P  | A - P     | A - P  | N - T       | 0.3 - 0.6                | 6.3 - 6.9 | 266.9 - 893.4                   | 10.5 - 17.6 |
